# Supplementary material for: Recent summer soil moisture drying in Switzerland based on measurements from the SwissSMEX network
Source: Copernicus journal article supplement (doi:10.5194/essd-2025-416), 2025-09-02
Supplement: Supplementary file 1 [file essd-2025-416-supplement.pdf]

Supplementary Information

Table S1 Sensor configurations used for calculating the historical 0–0.5 m integrated column soil moisture in the present analysis and in S22. The configurations refer to the “original configuration” of TDR (TD) and 10HS (HS) sensors, with profile number (if more than one is present at the station) and installation depths in cm indicated as well (i.e. “sensor(profile)\_depth”).

| Station | Present analysis                       | S22                            |
|---------|----------------------------------------|--------------------------------|
| BAS     | HS_005, HS_010, HS_030, HS_050         | HS_005, HS_010, HS_030, HS_050 |
| BER     | TD_010, HS_050                         | HS_005, HS_010, HS_050         |
| CHM     | HS_005, HS_030, HS_050                 | station not used               |
| CHN     | TD2_005, TD1_010, TD2_030, TD2_050     | HS1_005, HS1_010, HS1_050      |
| PAY     | TD_010, TD_050                         | station not used               |
| PLA     | HS_005, TD_010, TD_030, HS_050         | station not used               |
| REC     | TD_010, HS_030                         | TD_010, HS_030                 |
| RHB     | TD_005, TD_015, TD_025, TD_035, HS_055 | station not used               |
| TAE     | HS_005, TD_010, TD_050                 | station not used               |
| WYN     | TD_010, HS_030, TD_050                 | station not used               |

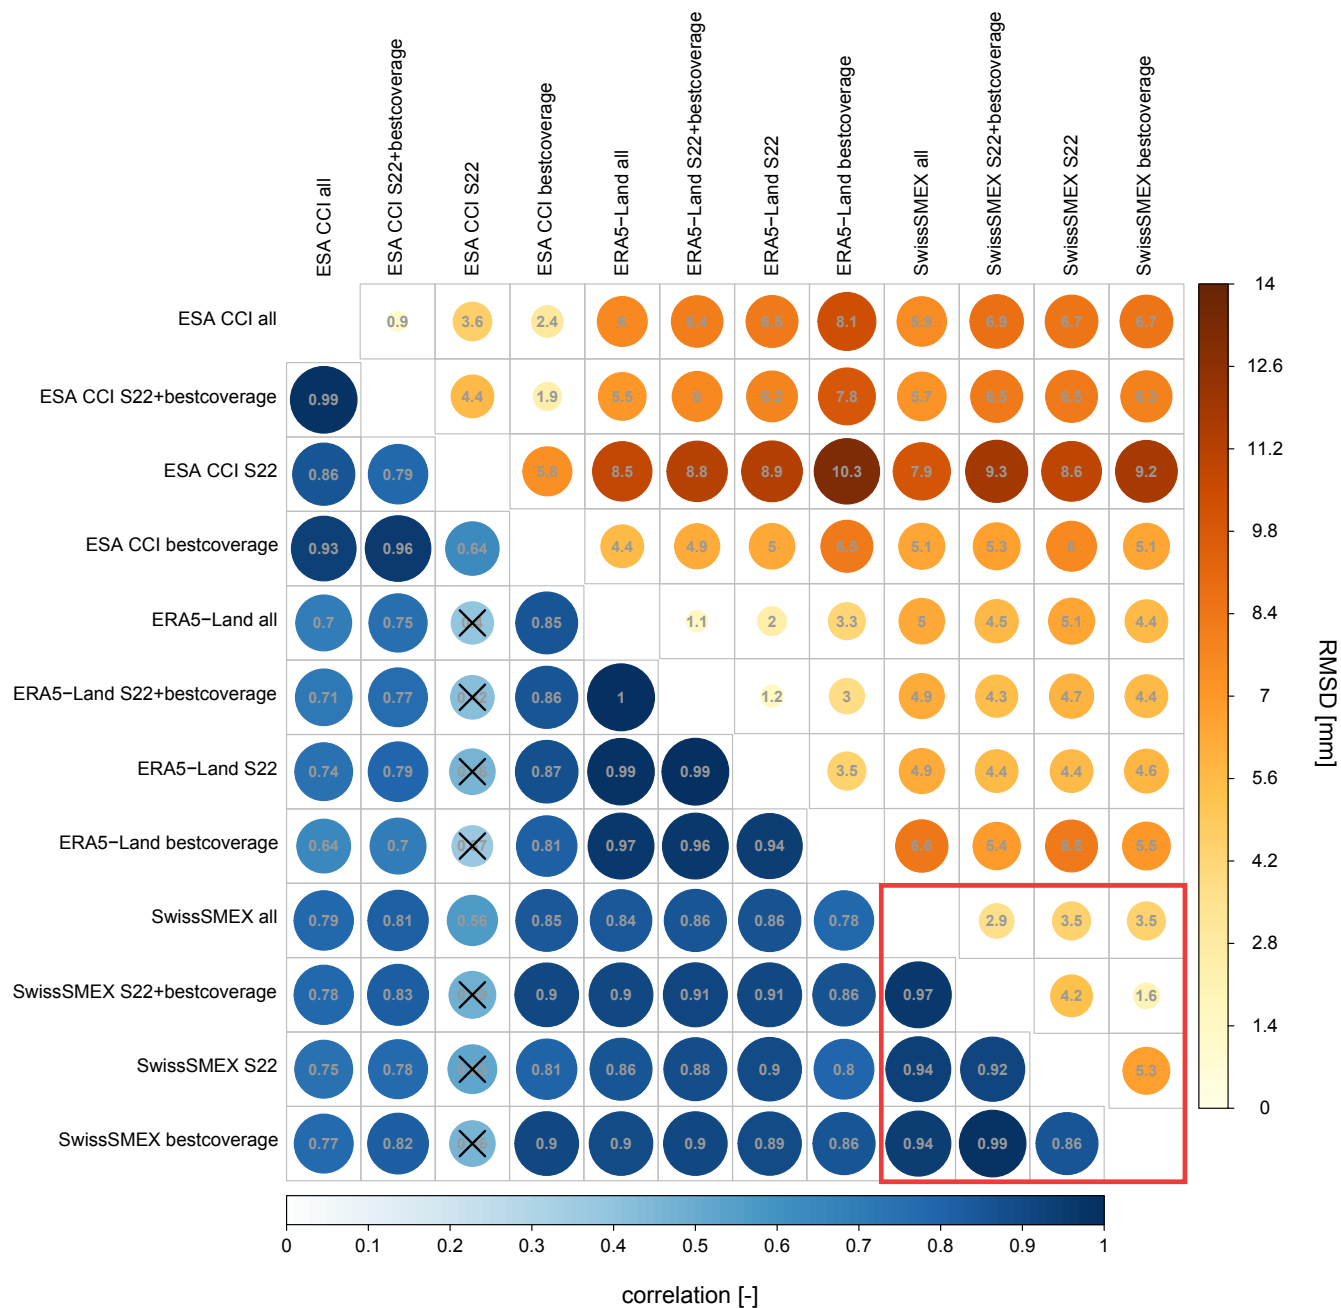

Figure S1. As Figure 4 of the main manuscript, but for summer half-year correlations and RMSDs.

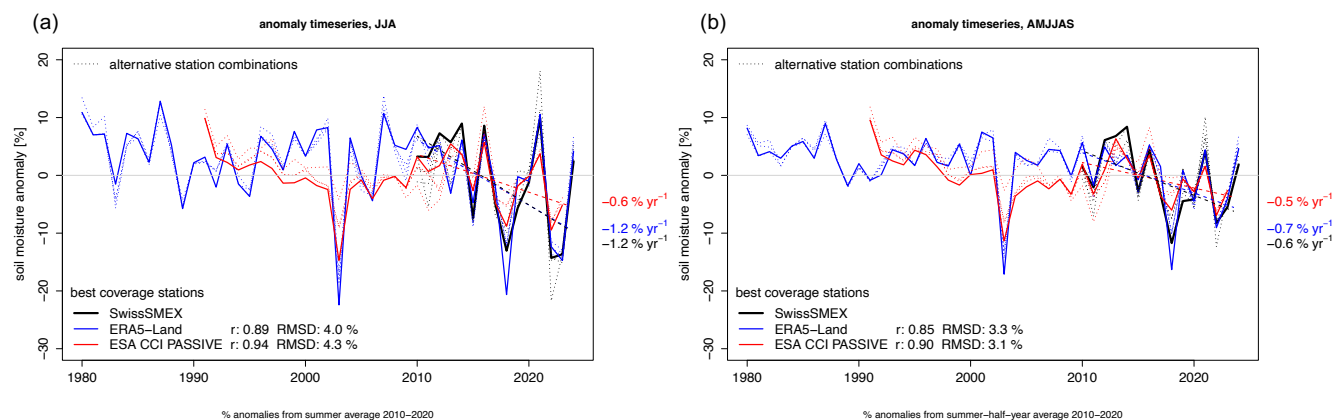

**Figure S2.** As Figure 5 of the main manuscript, but for (a) summer and (b) summer half-year 0–0.5 m integrated soil moisture anomalies expressed as percentage deviation from the corresponding average of the 2010–2020 period.
